# Supplementary material
Source: PubMed Central journal article supplement (PMC4834918)

**Supplementary Figure. CORT elevation in trunk blood after acute (3 hr) restraint stress in PACAP- and PAC1-deficient mice and wild-type male mice.**

CORT elevation after 3 hour restraint is PACAP- as well as PAC1-dependent in mice when blood obtained by decapitation. Results are expressed as mean  $\pm$ SEM (n = 9-10 per group ). Two-way ANOVA followed by Bonferroni's post hoc test. Bonferroni's test: \*\*\*p < 0.001; ns, not significant.

**Supplementary Figure**

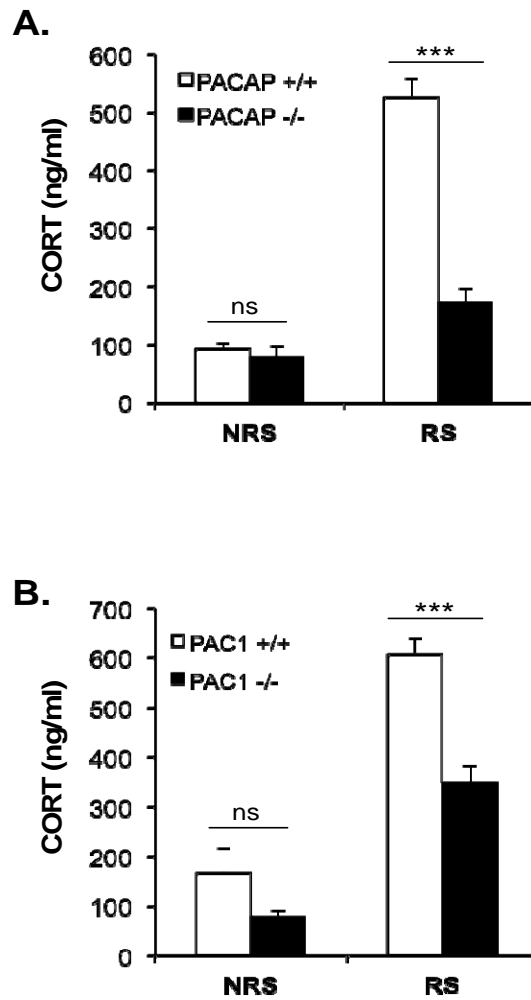

Supplement: NIHMS776387-supplement-Supplementary_Figure.pdf [file NIHMS776387-supplement-Supplementary_Figure.pdf]
